# Supplementary material for: Highly efficient non-noble metallic NiCu nanoalloy catalysts for hydrogenation of nitroarenes
Source: Royal Society of Chemistry journal article supplement (doi:10.1039/d1ma00557j), 2021-01-01
Supplement: d1ma00557j1.pdf [file d1ma00557j1.pdf]

## **Supporting Information**

### **Highly efficient non-noble metallic NiCu nanoalloy catalysts for hydrogenation of nitroarenes**

State Key Laboratory of Advanced Special Steel, School of Materials Science and Engineering, Shanghai University, 99 Shangda Road, BaoShan District, Shanghai 20444, China

Total number of Pages: 5

Total number of Table: 3

Total number of Figures: 3

**Table S1** Textural properties of the prepared catalysts

| Sample                                     | Ni (wt%) | Ni dispersion <sup>a</sup> (%) | Cu (wt%) | C (wt%) | S <sub>BET</sub> (m <sup>2</sup> g <sup>-1</sup> ) | V <sub>p</sub> (cm <sup>3</sup> g <sup>-1</sup> ) | D <sub>a</sub> (nm) | d <sub>x</sub> <sup>b</sup> (nm) | d <sub>t</sub> <sup>c</sup> (nm) |
|--------------------------------------------|----------|--------------------------------|----------|---------|----------------------------------------------------|---------------------------------------------------|---------------------|----------------------------------|----------------------------------|
| SiO <sub>2</sub>                           | /        | /                              | /        | /       | 324                                                | 1.03                                              | 13.0                | /                                | /                                |
| C@SiO <sub>2</sub> -800                    | /        | /                              | /        | /       | 246                                                | 0.69                                              | 11.6                | /                                | /                                |
| NiOCuO@SiO <sub>2</sub> -800               | 13.9     | /                              | 4.2      | /       | 211                                                | 0.69                                              | 12.8                | 12.7                             | 11.8                             |
| NiCu@SiO <sub>2</sub> -H <sub>2</sub> -800 | 14.9     | 5.0                            | 4.6      | /       | 223                                                | 0.69                                              | 12.4                | 21.4                             | 20.2                             |
| Ni/C@SiO <sub>2</sub> -800                 | 14.3     | 5.9                            | /        | 11.4    | 275                                                | 0.75                                              | 10.9                | 14.0                             | 13.9                             |
| Cu/C@SiO <sub>2</sub> -800                 | /        | /                              | 4.0      | 13.3    | 213                                                | 0.62                                              | 11.7                | 19.9                             | 20.0                             |
| NiCu/C@SiO <sub>2</sub> -750               | 13.8     | 8.2                            | 3.7      | 8.1     | 243                                                | 0.68                                              | 10.7                | 4.0                              | 3.9                              |
| NiCu/C@SiO <sub>2</sub> -800               | 13.7     | 7.8                            | 3.6      | 9.7     | 241                                                | 0.67                                              | 11.2                | 4.4                              | 4.6                              |
| NiCu/C@SiO <sub>2</sub> -850               | 13.8     | 7.5                            | 3.7      | 10.3    | 226                                                | 0.65                                              | 11.7                | 5.0                              | 5.1                              |
| NiCu/C@SiO <sub>2</sub> -900               | 13.9     | 6.7                            | 3.6      | 9.1     | 200                                                | 0.65                                              | 12.8                | 6.5                              | 6.4                              |

<sup>a</sup>Ni dispersion was calculated by the CO chemisorption method.

<sup>b</sup>Average crystal size from XRD.

<sup>c</sup>Average particle size from TEM.

**Table S2** Total Ni contents and Ni compositions in individual Ni species on the catalyst surface by XPS

| Catalyst                     | Total surface Ni (wt%) | Metallic Ni (wt%) | NiO (wt%) |
|------------------------------|------------------------|-------------------|-----------|
| Ni/C@SiO <sub>2</sub> -800   | 4.7                    | 1.3               | 3.4       |
| NiCu/C@SiO <sub>2</sub> -750 | 4.3                    | 1.5               | 2.8       |
| NiCu/C@SiO <sub>2</sub> -800 | 4.0                    | 2.4               | 1.6       |
| NiCu/C@SiO <sub>2</sub> -850 | 4.0                    | 2.5               | 1.5       |
| NiCu/C@SiO <sub>2</sub> -900 | 4.1                    | 2.7               | 1.4       |

**Table S3** Activity comparison between NiCu/C@SiO<sub>2</sub>-800 and metal catalysts ever reported for selective reduction of nitrobenzene

| Catalyst                                 | Nitrobenzene (mmol) | Hydrogen source                                 | Temperature (°C) | Time   | Con. (%) | TOF                  | Ref.      |
|------------------------------------------|---------------------|-------------------------------------------------|------------------|--------|----------|----------------------|-----------|
| NiCu/C@SiO <sub>2</sub> -800             | 50                  | H <sub>2</sub>                                  | 120              | 0.5 h  | 91       | 46.5 s <sup>-1</sup> | This work |
| Ni-Co/CeO <sub>2</sub> -CEC              | 0.81                | H <sub>2</sub>                                  | 150              | 1 h    | 88       | 563 h <sup>-1</sup>  | 1         |
| NiFe@NC-3                                | 0.64                | H <sub>2</sub>                                  | 80               | 2.5 h  | 98       | 65 h <sup>-1</sup>   | 2         |
| Ni/CeO <sub>2</sub> -CAS                 | 2.4                 | H <sub>2</sub>                                  | 210              | 7 h    | 84       | 2 h <sup>-1</sup>    | 3         |
| Co/mCN-900                               | 1                   | H <sub>2</sub>                                  | 120              | 4 h    | 100      | 12 h <sup>-1</sup>   | 4         |
| CoN <sub>x</sub> -OMC                    | 1                   | H <sub>2</sub>                                  | 110              | 1.5 h  | >99      | 56 h <sup>-1</sup>   | 5         |
| Co@mesoNC                                | 1                   | H <sub>2</sub>                                  | 110              | 2 h    | 55       | 42 h <sup>-1</sup>   | 6         |
| acid MOF@C-800                           | 0.5                 | H <sub>2</sub>                                  | 120              | 20 h   | 98       | 1 h <sup>-1</sup>    | 7         |
| CoO <sub>x</sub> @NC-800                 | 0.5                 | H <sub>2</sub>                                  | 110              | 5 h    | 100      | 2 h <sup>-1</sup>    | 8         |
| Co@NC-800                                | 0.5                 | H <sub>2</sub>                                  | 100              | 14 h   | >99      | 12 h <sup>-1</sup>   | 9         |
| 0.09%Pt/γ-Al <sub>2</sub> O <sub>3</sub> | 1.27                | H <sub>2</sub>                                  | 40               | 50 min | 2        | 216 h <sup>-1</sup>  | 10        |
| 0.2%Pt/Fe <sub>2</sub> O <sub>3</sub>    | 1                   | H <sub>2</sub>                                  | 30               | 2 h    | >99      | 3170 h <sup>-1</sup> | 11        |
| Ni-N-C-700                               | 0.25                | NaBH <sub>4</sub>                               | r.t.             | 15 min | 2        | 668 h <sup>-1</sup>  | 12        |
| Fe-CN@550                                | 1                   | NaBH <sub>4</sub>                               | 50               | 10 h   | 98       | 1968 h <sup>-1</sup> | 13        |
| PdCo/CCF                                 | 1                   | NaBH <sub>4</sub>                               | r.t.             | 0.5 h  | 91       | 142 h <sup>-1</sup>  | 14        |
| Co@NC-800                                | 1                   | N <sub>2</sub> H <sub>4</sub> ·H <sub>2</sub> O | 80               | 30 min | 100      | 33 h <sup>-1</sup>   | 15        |

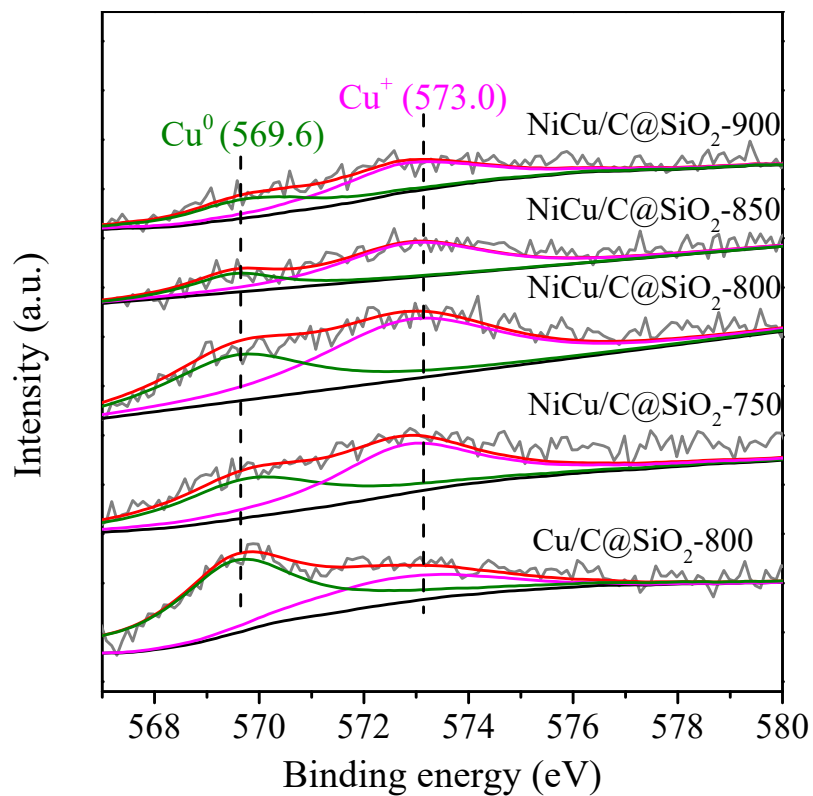

**Fig. S1 Cu LMM Auger spectra of  $\text{Cu/C@SiO}_2$  and  $\text{NiCu/C@SiO}_2$ -*T* catalysts.**

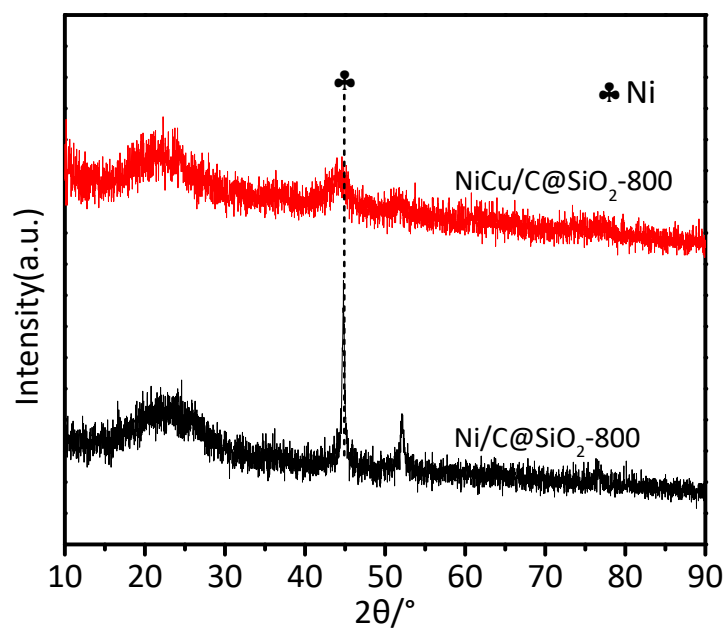

**Fig. S2** XRD patterns of spent Ni/C@SiO<sub>2</sub>-800 and NiCu/C@SiO<sub>2</sub>-800 catalysts for the hydrogenation of nitrobenzene after the 10th run.

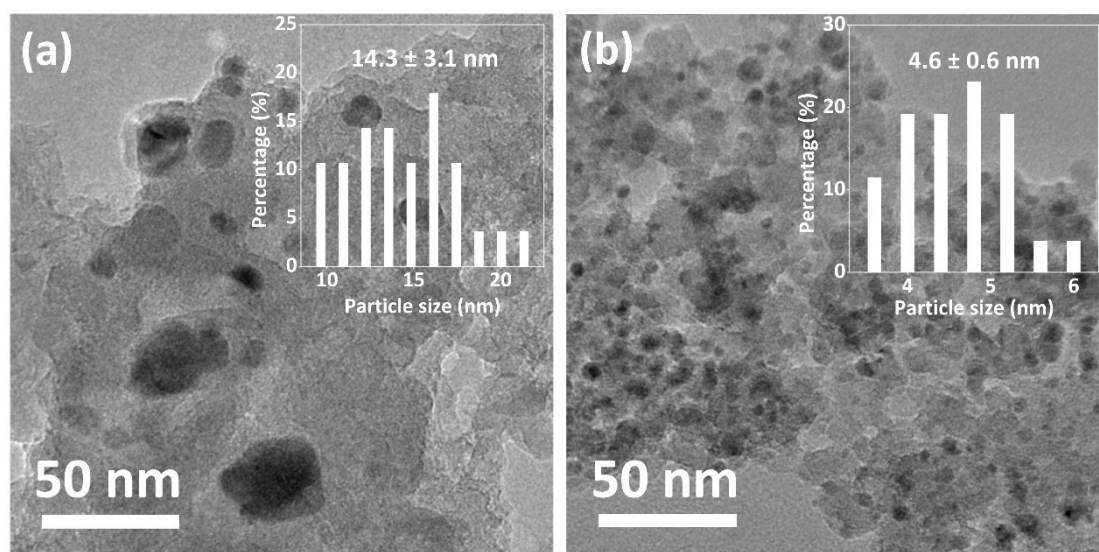

**Fig. S3** TEM images of spent catalysts after the 10th run, (a) Ni/C@SiO<sub>2</sub>-800 and (b) NiCu/C@SiO<sub>2</sub>-800.

## References

- 1 W. Li, W. She, J. Wang, X. Li, J. Li, J. Shi and G. Li, *ACS Appl. Nano Mater.*, 2020, **3**, 10796–10804.
- 2 Y. Zhang, C. Liu, G. Fan, L. Yang and F. Li, *Dalton Trans.*, 2018, **47**, 13668–13679.
- 3 W. She, T. Qi, M. Cui, P. Yan, S. W. Ng, W. Li and G. Li, *ACS Appl. Mater. Interfaces*, 2018, **10**, 14698–14707.
- 4 X. Cui, K. Liang, M. Tian, Y. Zhu, J. Ma and Z. Dong, *J. Colloid Interface Sci.*, 2017, **501**, 231–240.
- 5 X. Wei, Z. Zhang, M. Zhou, A. Zhang, W. D. Wu and Z. Wu, *Nanoscale*, 2018, **10**, 16839–16847.
- 6 Z. Zhang, X. Wei, Y. Yao, Z. Chen, A. Zhang, W. Li, W. D. Wu, Z. Wu, X. D. Chen and D. Zhao, *Small*, 2017, **13**, 1702243.
- 7 K. Murugesan, T. Senthamarai, M. Sohail, A. S. Alshammari, M.-M. Pohl, M. Beller and R. V. Jagadeesh, *Chem. Sci.*, 2018, **9**, 8553–8560.
- 8 T. Song, P. Ren, Y. Duan, Z. Wang, X. Chen and Y. Yang, *Green Chem.*, 2018, **20**, 4629–4637.
- 9 S. Gutiérrez-Tarriño, S. Rojas, C. W. Lopes, G. Agostini, J. J. Calvino, A. Corma and P. Oña-Burgos, *Green Chem.*, 2021, Advance Article.
- 10 Y Zhang and J Zhou, *J. Catal.*, 2021, **395**, 445–456.
- 11 P. Jing, T. Gan, H. Qi, B. Zheng, X. Chu, G. Yu, W. Yan, Y. Zou, W. Zhang and G. Liu, *Chinese J. Catal.*, 2019, **40**, 214–222.
- 12 F. Yang, M. Wang, W. Liu, B. Yang, Y. Wang, J. Luo, Y. Tang, L. Hou, Y. Li, Z. Li, B. Zhang, W. Yang and Y. Li, *Green Chem.*, 2019, **21**, 704–711.
- 13 M. S. Mirhosseini and F. Nemat, *Int. J. Biol. Macromol.*, 2021, **175**, 432–442.
- 14 J. Yang, W. D. Wang and Z. Dong, *J. Colloid Interface Sci.*, 2018, **524**, 84–92.
- 15 Y. Cao, K. Liu and C. Wu, H. Zhang and Q. Zhang, *Appl. Catal., A*, 2020, **592**, 117434.
